# Supplementary material for: The Effects of Paddy Cultivation and Microbiota Members on Arsenic Accumulation in Rice Grain
Source: Foods. 2023 May 26;12(11):2155. doi: 10.3390/foods12112155 (PMC10252851; doi:10.3390/foods12112155)
Supplement: Supplementary file 1 [file foods-12-02155-s001.zip › foods-2354998-supplementary.pdf]

## SUPPLEMENTARY INFORMATION

### The Effects of Paddy Cultivation and Microbiota Members on Arsenic Accumulation in Rice Grain

Esra Ersoy Omeroglu<sup>1,\*</sup>, Asli Bayer<sup>1</sup>, Mert Sudagidan<sup>2</sup>, Veli Cengiz Özalp<sup>2</sup>, Ihsan Yasa<sup>1</sup>

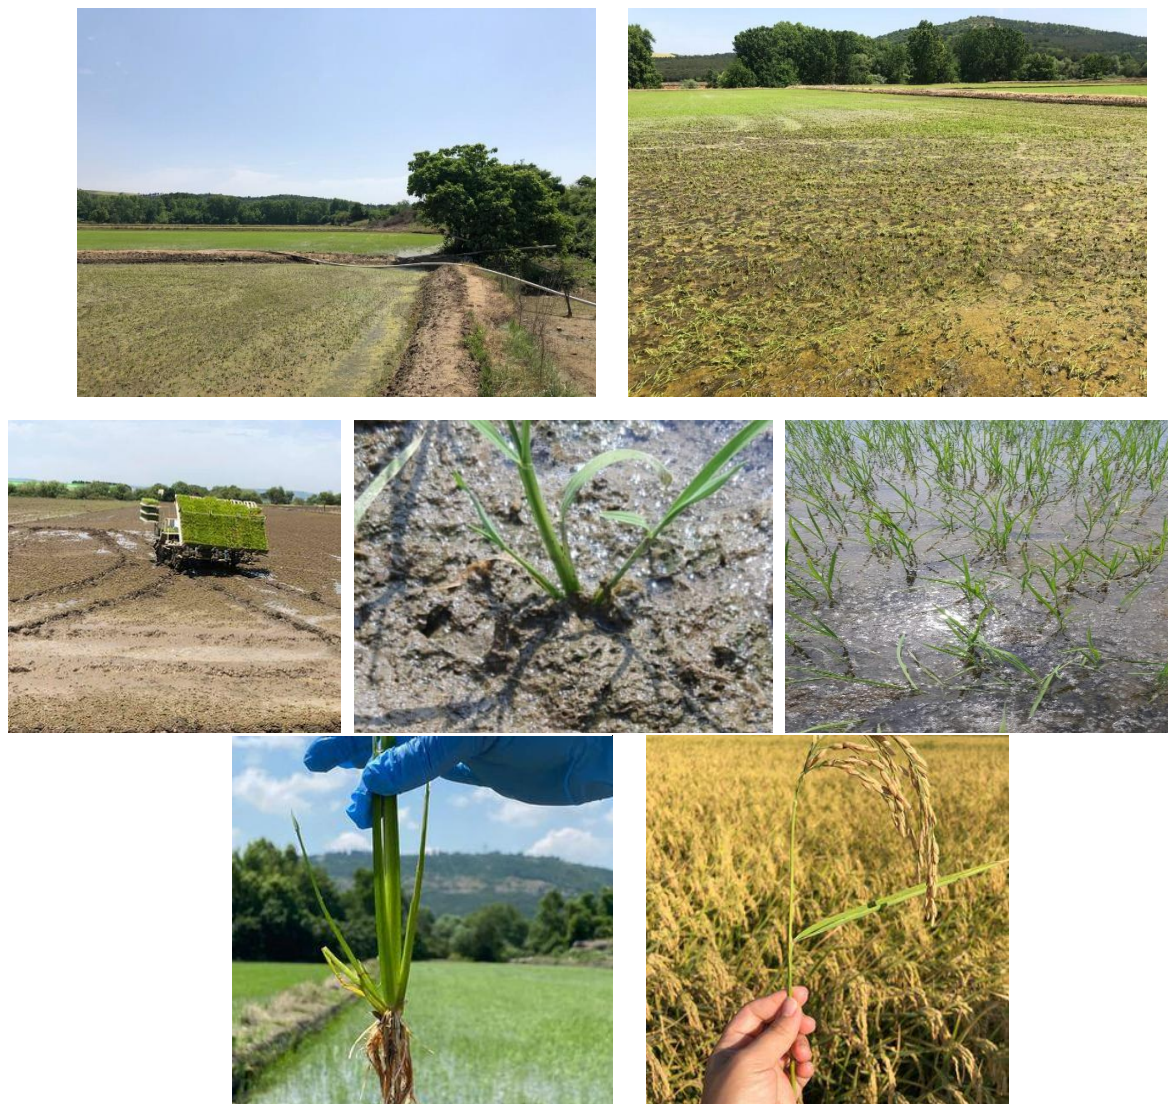

**Figure S1.** Various Images of Rice Sampling.

A

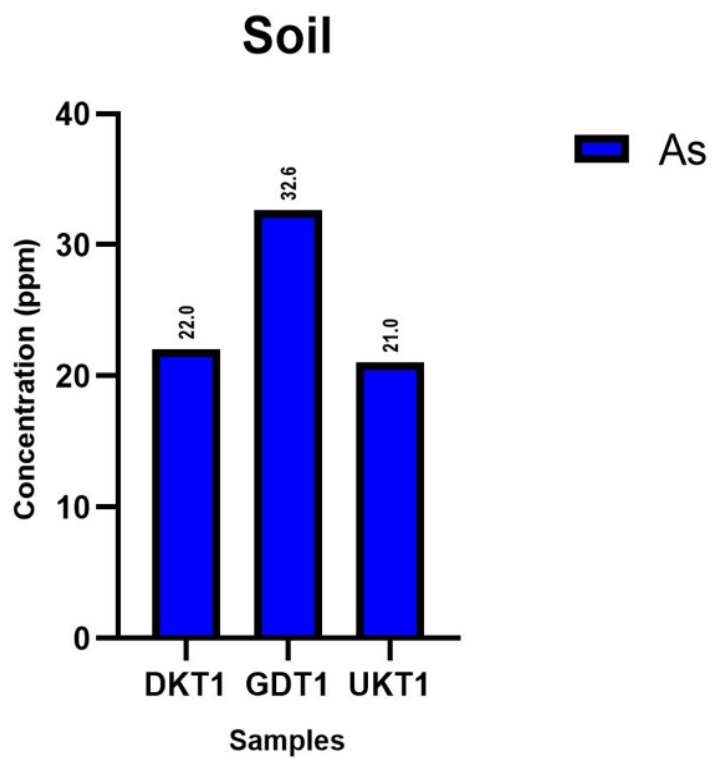

| Table format:<br>Grouped |      | Group A | Group B | Group C | Group D | Group E | Group F | Group G |
|--------------------------|------|---------|---------|---------|---------|---------|---------|---------|
|                          |      | P       | K       | Mn      | Fe      | Cu      | Zn      | As      |
| 1                        | DKT1 | 64.834  | 3246.00 | 549.100 | 28666.9 | 24.4    | 76.0    | 22.0    |
| 2                        | GDT1 | 45.650  | 4331.30 | 867.900 | 38197.8 | 39.9    | 112.5   | 32.6    |
| 3                        | UKT1 | 73.436  | 2808.40 | 405.400 | 28190.9 | 21.5    | 68.5    | 21.0    |

B

## Water

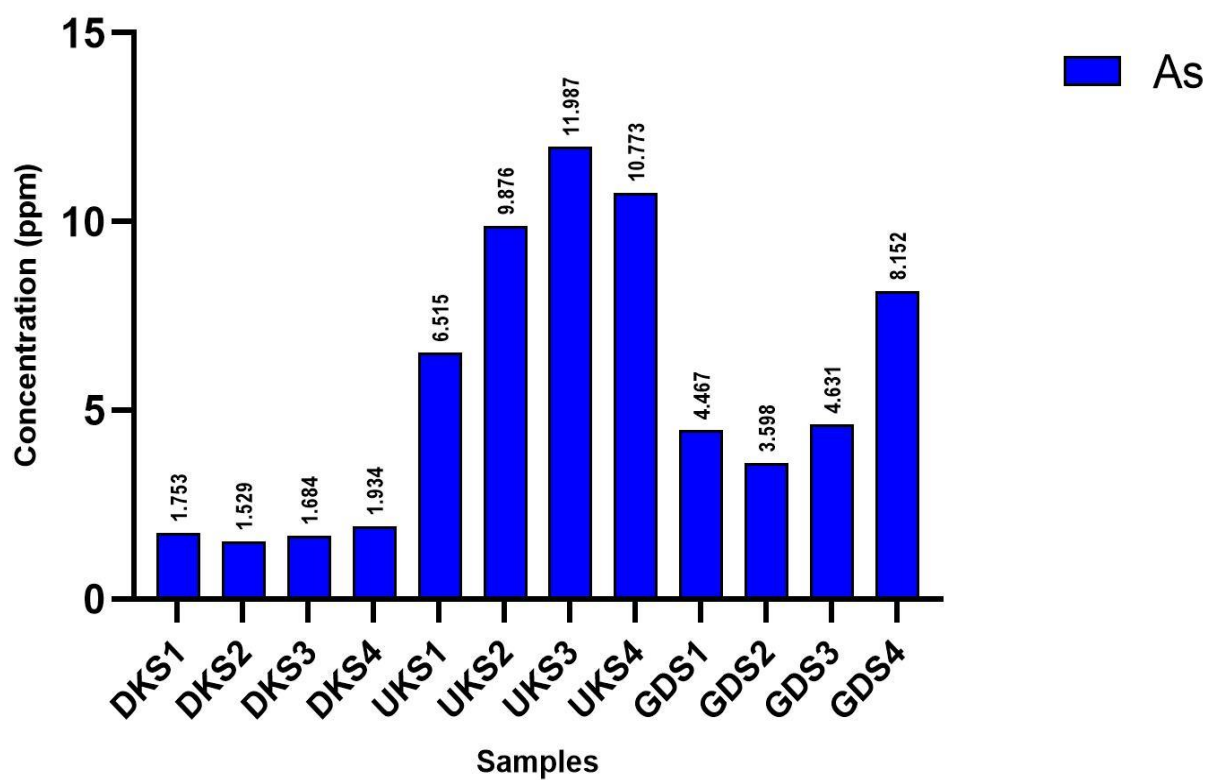

| Table format:<br>Grouped |      | Group A   | Group B   | Group C | Group D | Group E | Group F | Group G |
|--------------------------|------|-----------|-----------|---------|---------|---------|---------|---------|
|                          |      | P         | K         | Mn      | Fe      | Cu      | Zn      | As      |
| 1                        | DKS1 | 26.30452  | 3393.143  | 1.471   | 27.839  | 0.522   | 0.000   | 1.753   |
| 2                        | DKS2 | 7.85378   | 2848.286  | 3.036   | 0.740   | 0.020   | 3.356   | 1.529   |
| 3                        | DKS3 | 49.28000  | 2308.761  | 2.273   | 0.740   | 0.253   | 1.825   | 1.684   |
| 4                        | DKS4 | 93.00000  | 3991.365  | 7.227   | 0.740   | 0.473   | 19.008  | 1.934   |
| 5                        | UKS1 | 411.31270 | 7319.941  | 25.455  | 57.070  | 1.338   | 1.447   | 6.515   |
| 6                        | UKS2 | 635.20800 | 8356.629  | 1.237   | 11.702  | 2.216   | 11.401  | 9.876   |
| 7                        | UKS3 | 475.64000 | 7991.434  | 3.122   | 10.531  | 0.705   | 2.217   | 11.987  |
| 8                        | UKS4 | 828.00000 | 12443.950 | 5.484   | 0.740   | 0.775   | 14.949  | 10.773  |
| 9                        | GDS1 | 67.98924  | 2590.427  | 52.422  | 159.760 | 2.957   | 0.509   | 4.467   |
| 10                       | GDS2 | 33.73766  | 2520.335  | 0.314   | 2.152   | 0.671   | 2.349   | 3.598   |
| 11                       | GDS3 | 28.38000  | 2680.144  | 1.703   | 6.805   | 1.314   | 2.365   | 4.631   |
| 12                       | GDS4 | 46.00000  | 2760.579  | 0.040   | 0.740   | 0.853   | 16.313  | 8.152   |

c

## Sludge

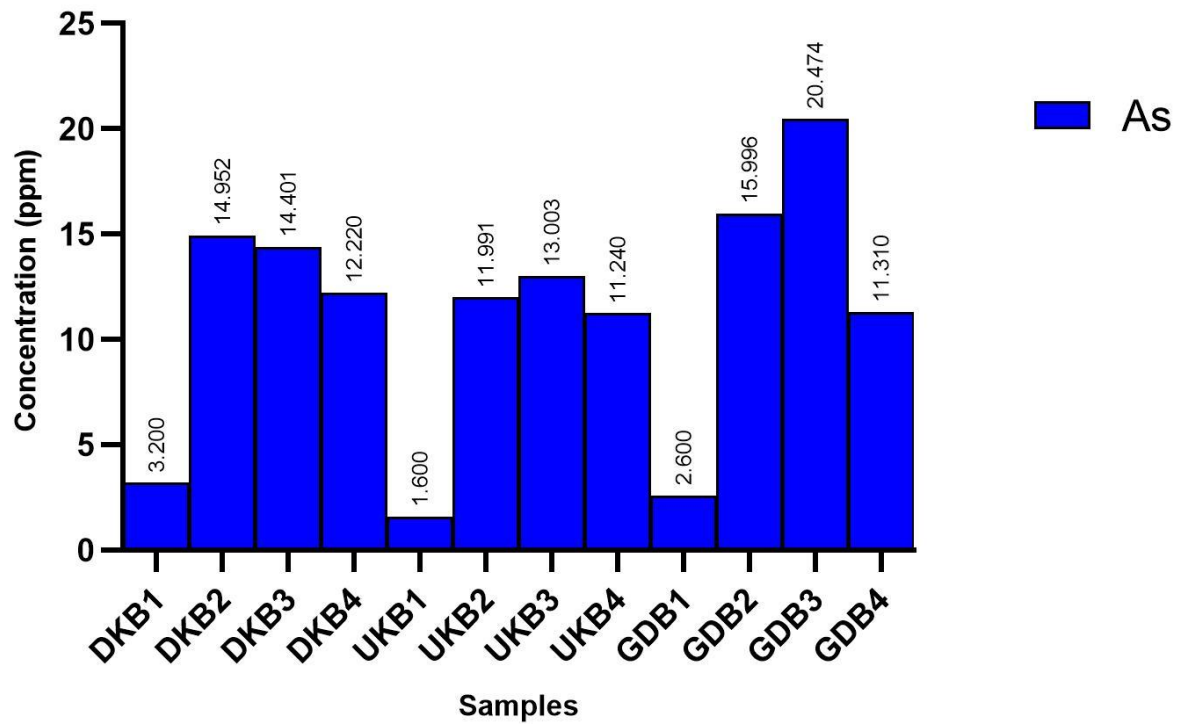

| Table format:<br>Grouped |      | Group A  | Group B  | Group C | Group D  | Group E | Group F | Group G |
|--------------------------|------|----------|----------|---------|----------|---------|---------|---------|
|                          |      | P        | K        | Mn      | Fe       | Cu      | Zn      | As      |
| 1                        | DKB1 | 21.5820  | 475.300  | 83.600  | 3684.50  | 3.800   | 10.300  | 3.200   |
| 2                        | DKB2 | 347.6024 | 3127.697 | 336.854 | 20395.22 | 15.755  | 51.448  | 14.952  |
| 3                        | DKB3 | 438.2083 | 2301.892 | 336.494 | 18196.37 | 13.974  | 45.026  | 14.401  |
| 4                        | DKB4 | 214.4600 | 1278.580 | 143.980 | 8427.15  | 7.190   | 45.840  | 12.220  |
| 5                        | UKB1 | 17.7100  | 361.000  | 36.800  | 2197.20  | 2.100   | 6.000   | 1.600   |
| 6                        | UKB2 | 276.7959 | 2038.578 | 248.641 | 16528.71 | 12.054  | 37.302  | 11.991  |
| 7                        | UKB3 | 366.0094 | 1375.251 | 206.462 | 15015.74 | 11.475  | 34.944  | 13.003  |
| 8                        | UKB4 | 216.1900 | 1350.670 | 130.230 | 8850.39  | 6.520   | 38.020  | 11.240  |
| 9                        | GDB1 | 14.4540  | 519.600  | 72.400  | 3354.70  | 3.500   | 9.200   | 2.600   |
| 10                       | GDB2 | 271.9774 | 2230.848 | 378.413 | 21212.83 | 22.072  | 58.430  | 15.996  |
| 11                       | GDB3 | 402.6893 | 2230.617 | 383.521 | 23104.90 | 24.278  | 63.329  | 20.474  |
| 12                       | GDB4 | 139.6400 | 1170.630 | 151.210 | 6945.50  | 7.940   | 46.460  | 11.310  |

D

## Root

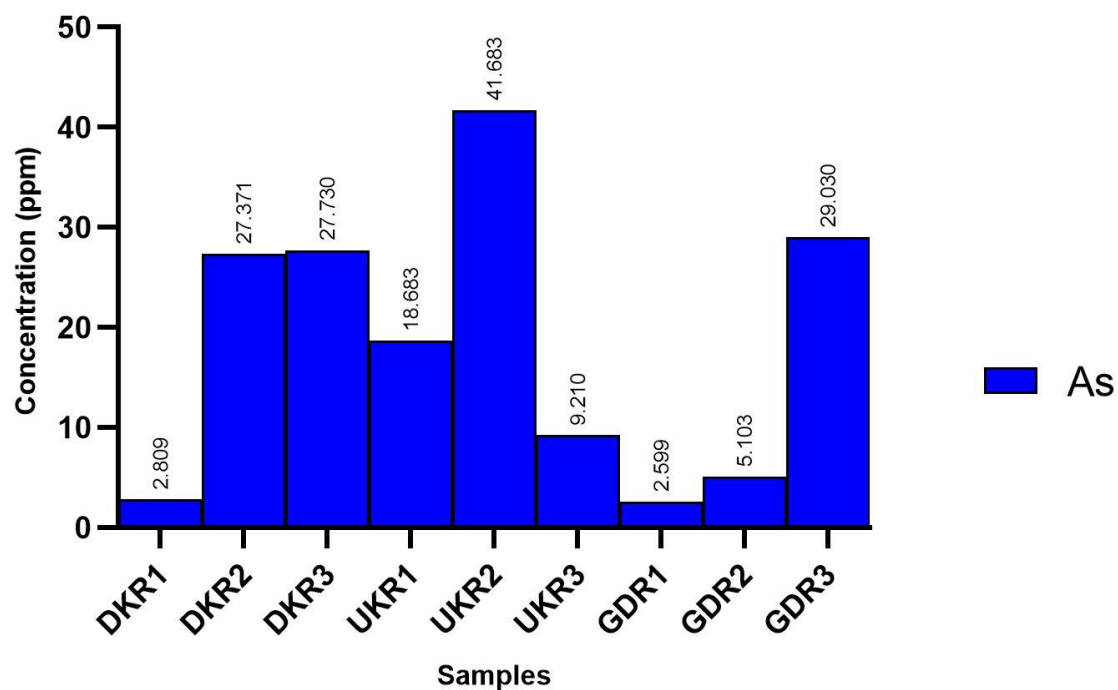

| Table format:<br>Grouped |      | Group A   | Group B  | Group C | Group D  | Group E | Group F | Group G |
|--------------------------|------|-----------|----------|---------|----------|---------|---------|---------|
|                          |      | P         | K        | Mn      | Fe       | Cu      | Zn      | As      |
|                          |      |           |          |         |          |         |         |         |
| 1                        | DKR1 | 546.83662 | 1613.993 | 83.158  | 1229.061 | 3.528   | 9.937   | 2.809   |
| 2                        | DKR2 | 372.46858 | 2509.630 | 112.677 | 3640.166 | 6.433   | 12.711  | 27.371  |
| 3                        | DKR3 | 177.32000 | 365.930  | 179.680 | 4957.900 | 4.690   | 54.420  | 27.730  |
| 4                        | UKR1 | 560.44208 | 1747.798 | 101.019 | 3407.661 | 7.224   | 12.525  | 18.683  |
| 5                        | UKR2 | 611.54324 | 1699.134 | 84.458  | 5811.640 | 2.745   | 9.483   | 41.683  |
| 6                        | UKR3 | 279.56000 | 618.480  | 113.460 | 2109.080 | 4.910   | 21.610  | 9.210   |
| 7                        | GDR1 | 779.36804 | 1499.451 | 74.557  | 1640.708 | 4.816   | 13.056  | 2.599   |
| 8                        | GDR2 | 219.35276 | 2314.840 | 63.274  | 1253.557 | 4.102   | 6.684   | 5.103   |
| 9                        | GDR3 | 119.70000 | 167.640  | 182.180 | 2389.630 | 2.400   | 12.450  | 29.030  |

## Shoot

E

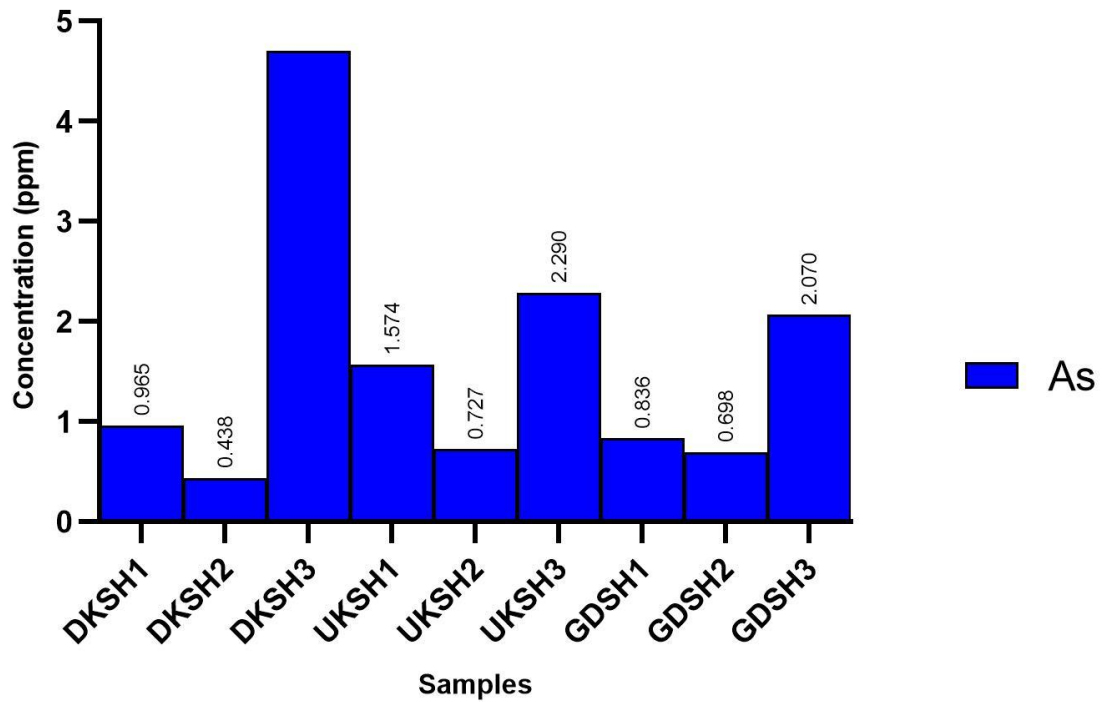

| Table format:<br>Grouped |       | Group A    | Group B   | Group C  | Group D  | Group E | Group F | Group G |
|--------------------------|-------|------------|-----------|----------|----------|---------|---------|---------|
|                          |       | P          | K         | Mn       | Fe       | Cu      | Zn      | As      |
| 1                        | DKSH1 | 868.17676  | 7477.093  | 105.739  | 831.908  | 3.833   | 17.242  | 0.965   |
| 2                        | DKSH2 | 477.59052  | 4398.930  | 76.164   | 160.201  | 2.340   | 11.781  | 0.438   |
| 3                        | DKSH3 | 493.82000  | 8438.580  | 1209.730 | 324.240  | 1.670   | 18.800  | 4.700   |
| 4                        | UKSH1 | 749.70324  | 5692.137  | 133.261  | 1403.084 | 7.083   | 26.758  | 1.574   |
| 5                        | UKSH2 | 382.75600  | 2412.270  | 54.582   | 135.136  | 0.760   | 7.916   | 0.727   |
| 6                        | UKSH3 | 465.04000  | 4513.370  | 799.490  | 370.550  | 1.960   | 16.280  | 2.290   |
| 7                        | GDSH1 | 1391.29078 | 10096.011 | 125.296  | 662.468  | 5.938   | 25.443  | 0.836   |
| 8                        | GDSH2 | 665.00544  | 5330.514  | 126.919  | 211.562  | 2.674   | 12.656  | 0.698   |
| 9                        | GDSH3 | 179.80000  | 2608.340  | 747.710  | 459.940  | 6.020   | 15.600  | 2.070   |

F

## Grain and husk

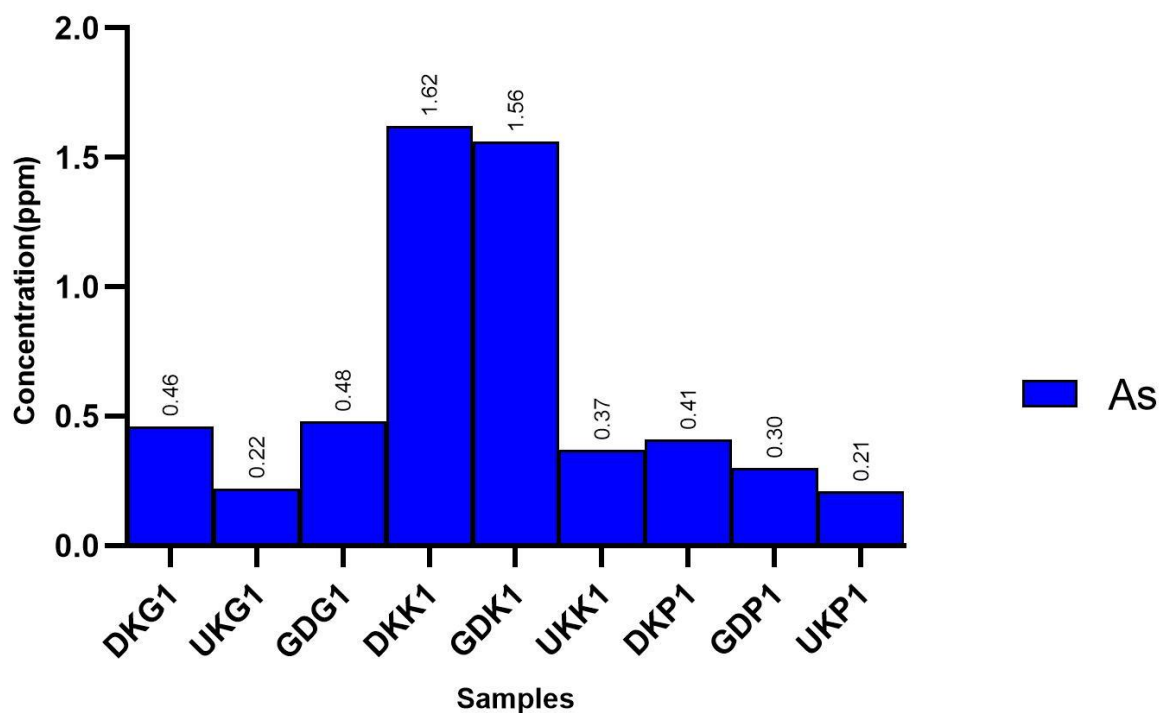

| Table format:<br>Grouped |      | Group A | Group B  | Group C | Group D | Group E | Group F | Group G |
|--------------------------|------|---------|----------|---------|---------|---------|---------|---------|
|                          |      | P       | K        | Mn      | Fe      | Cu      | Zn      | As      |
| 1                        | DKG1 | 2474.89 | 3273.70  | 113.09  | 71.32   | 3.01    | 18.77   | 0.46    |
| 2                        | UKG1 | 1994.49 | 2329.61  | 74.71   | 45.47   | 2.46    | 17.38   | 0.22    |
| 3                        | GDG1 | 2821.10 | 4551.39  | 148.00  | 65.32   | 3.96    | 24.33   | 0.48    |
| 4                        | DKK1 | 233.17  | 9439.42  | 200.06  | 129.54  | 1.58    | 13.42   | 1.62    |
| 5                        | GDK1 | 674.37  | 10355.64 | 270.65  | 169.32  | 2.52    | 16.14   | 1.56    |
| 6                        | UKK1 | 424.39  | 4846.94  | 268.82  | 78.15   | 1.75    | 15.29   | 0.37    |
| 7                        | DKP1 | 3125.30 | 4013.06  | 28.18   | 49.11   | 2.18    | 18.61   | 0.41    |
| 8                        | GDP1 | 3079.80 | 3428.45  | 28.14   | 54.63   | 3.15    | 18.87   | 0.30    |
| 9                        | UKP1 | 2865.89 | 3422.86  | 39.25   | 53.73   | 3.76    | 24.53   | 0.21    |

**Figure S2.** Graphics Related to Arsenic Amounts of Rice Agricultural Land Samples and Chemical Analysis Results. A: Soil, B: Water, C: Sludge, D: Root, E: Shoot, F: Grain and husk.

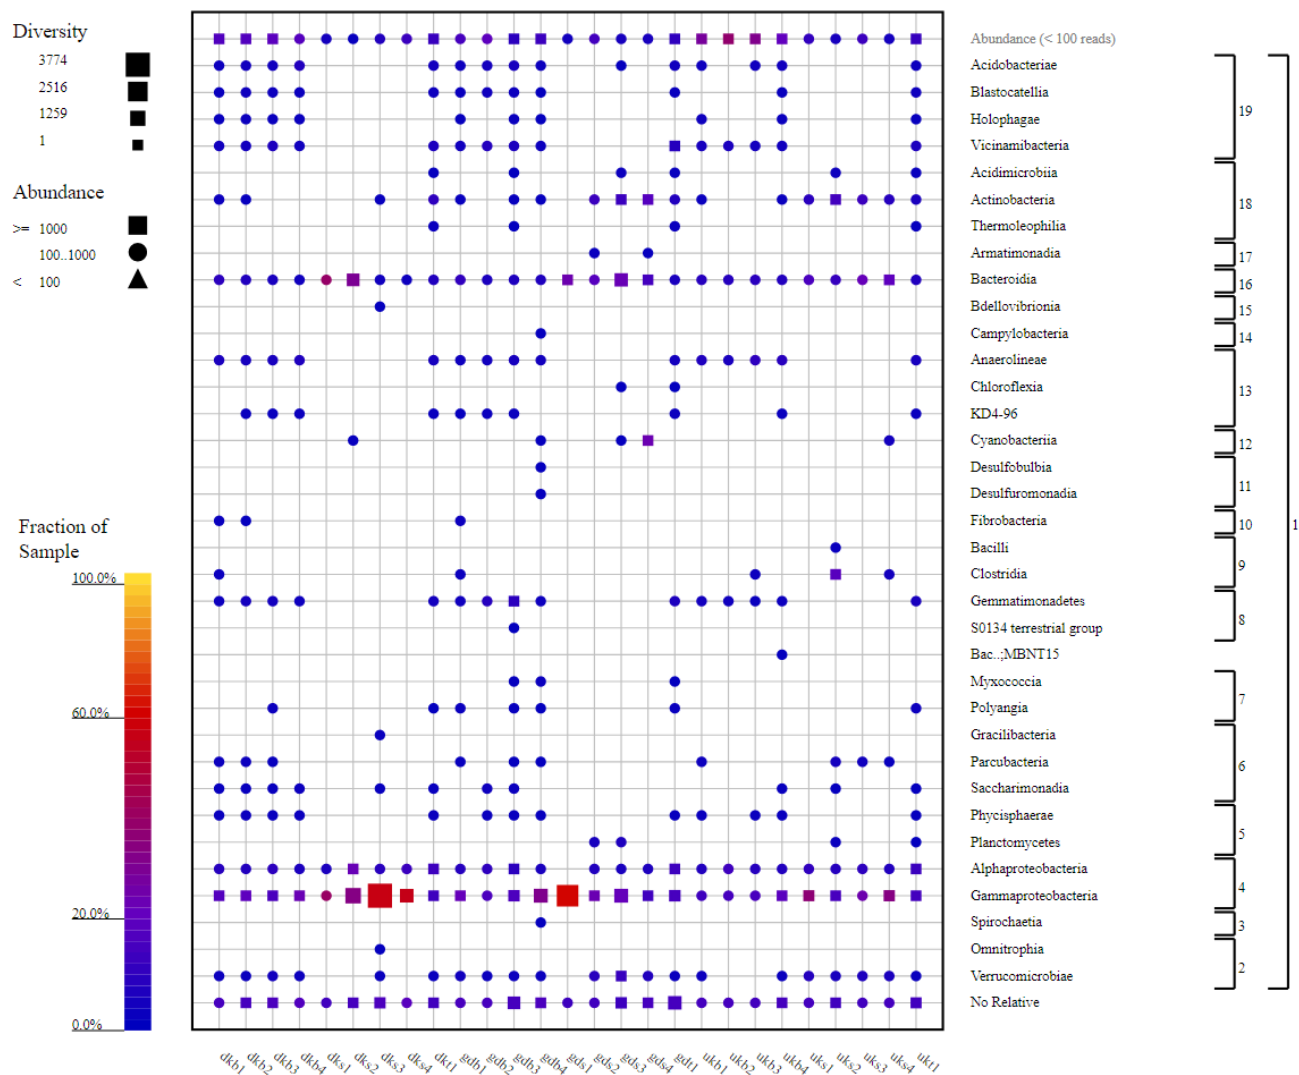

**Figure S3.** Classis-level taxonomic fingerprint of water, soil and sludge samples from rice farming (The figure was created using SILVA NGS 1.4 v138.1).

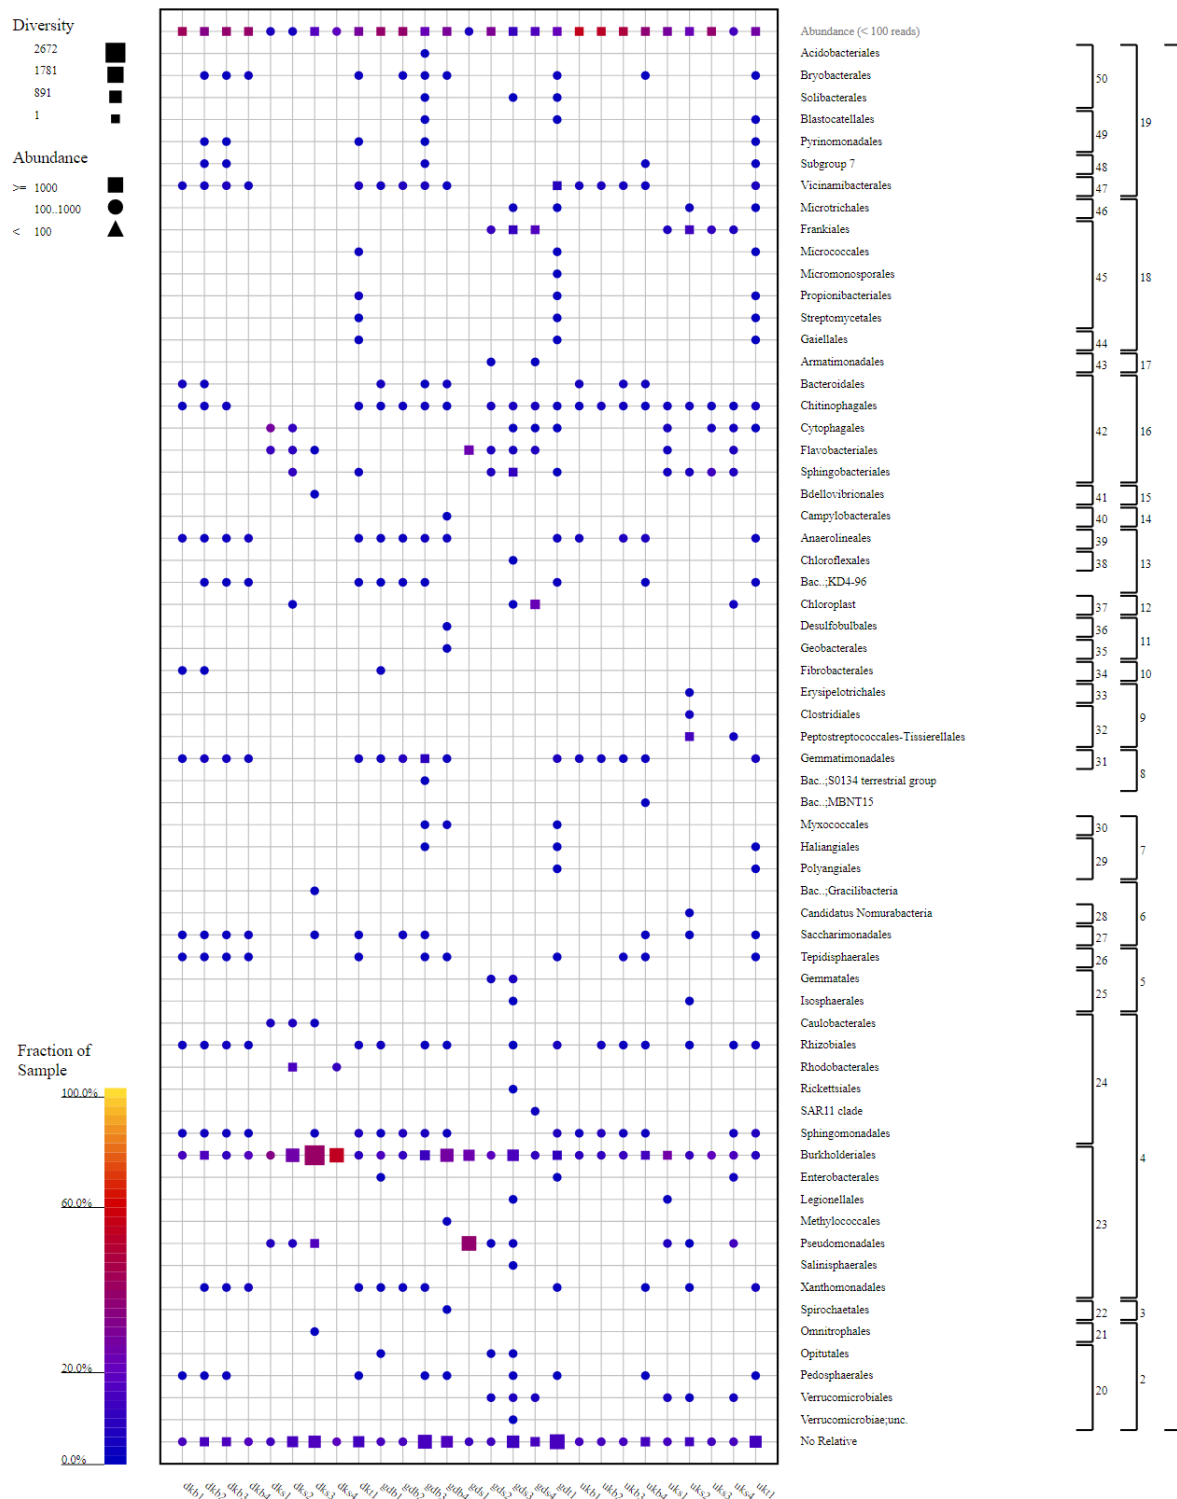

**Figure S4.** Order-level taxonomic fingerprint of water, soil and sludge samples from rice farming (The figure was created using SILVA NGS 1.4 v138.1).

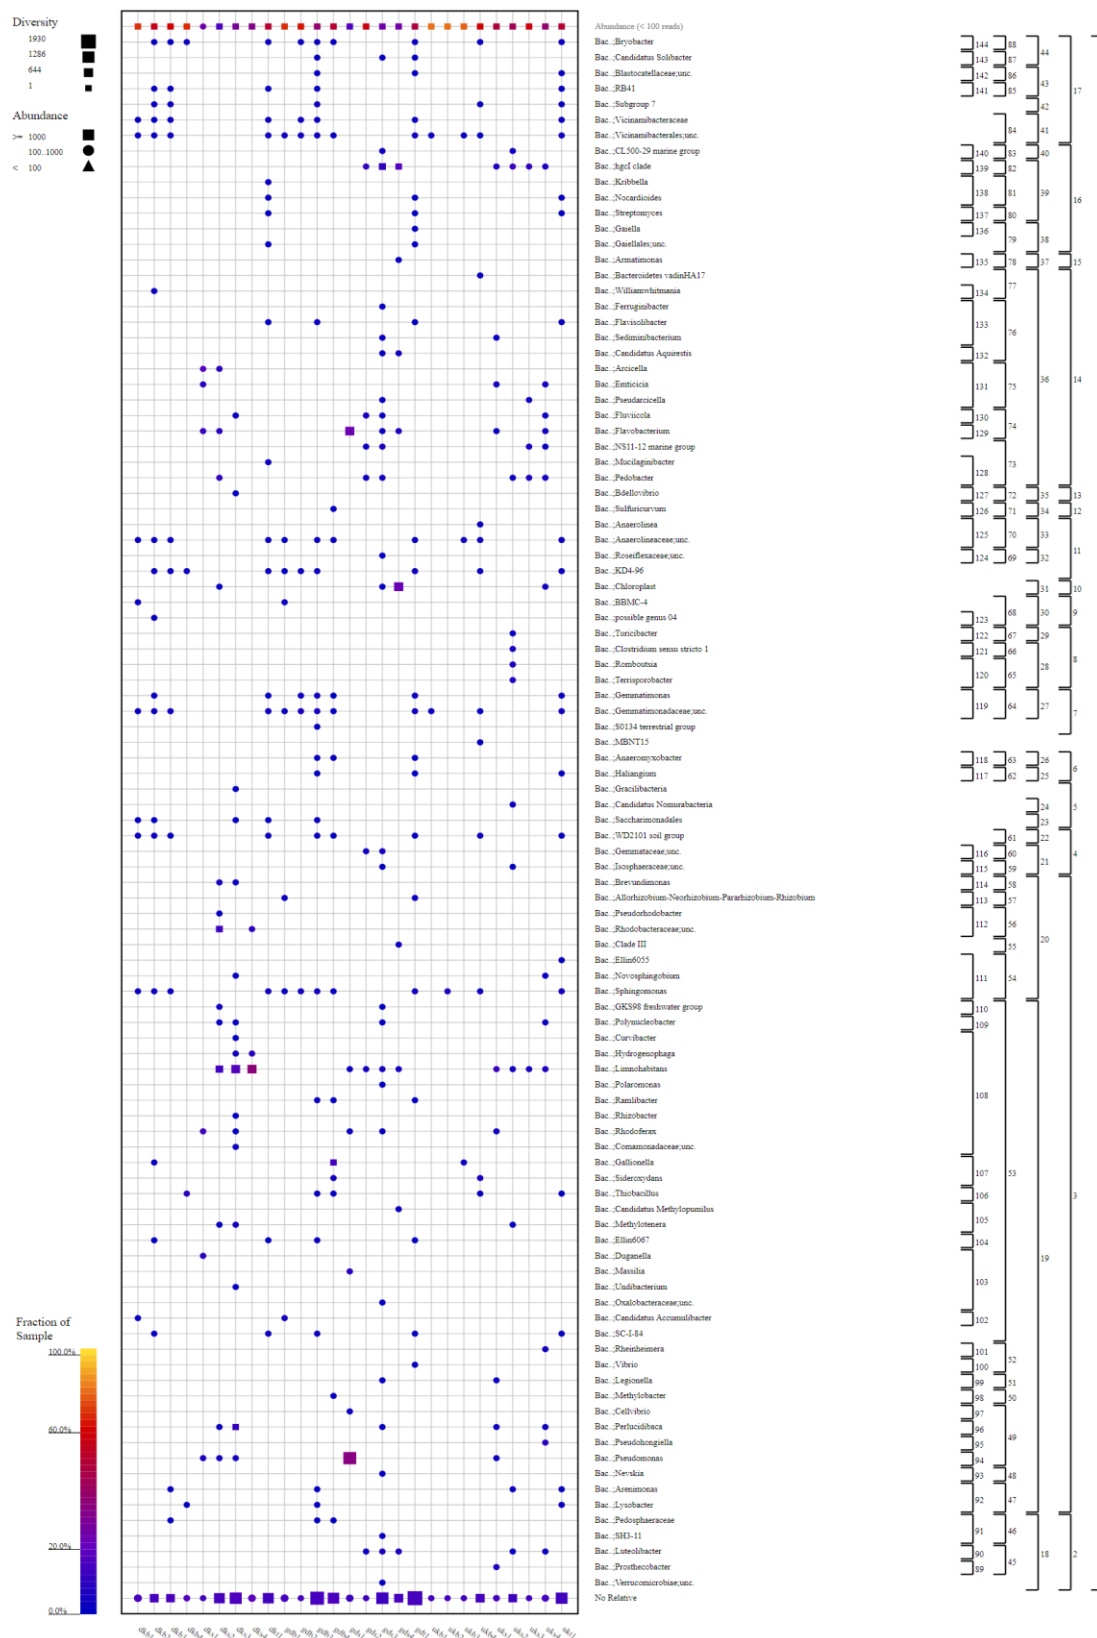

**Figure S5.** Species-level taxonomic fingerprint of water, soil and sludge samples from rice farming (The figure was created using SILVA NGS 1.4 v138.1).

**Table S1.** Shannon Index Value of Samples.

| <i>Sample Name</i> | <i>Shannon Index</i> |
|--------------------|----------------------|
| DKB1               | 8.57                 |
| DKB2               | 8.62                 |
| DKB3               | 8.56                 |
| DKB4               | 8.20                 |
| DKS1               | 7.00                 |
| DKS2               | 8.30                 |
| DKS3               | 8.42                 |
| DKS4               | 7.81                 |
| DKT1               | 8.82                 |
| GDB1               | 8.41                 |
| GDB2               | 8.13                 |
| GDB3               | 9.02                 |
| GDB4               | 8.65                 |
| GDS1               | 8.27                 |
| GDS2               | 8.00                 |
| GDS3               | 8.65                 |
| GDS4               | 8.17                 |
| GDT1               | 9.07                 |
| UKB1               | 8.23                 |
| UKb2               | 7.86                 |
| UKB3               | 8.17                 |
| UKB4               | 8.70                 |
| UKS1               | 8.09                 |
| UKS2               | 8.26                 |
| UKS3               | 7.55                 |
| UKS4               | 8.21                 |
| UKT1               | 8.92                 |
